# Supplementary material for: What drives the perceptual change resulting from speech motor adaptation? Evaluation of hypotheses in a Bayesian modeling framework
Source: PLOS journal article supplement (doi:10.1371/journal.pcbi.1005942), 2018-01-22
Supplement: S1 (10.1371/journal.pcbi.1005942.s001) [file journal.pcbi.1005942.s001]

# Supporting information S1.

## Detailed model definition

This section provides additional technical description of the way our model is defined. The model definition applies the Bayesian Programming methodology [1], that proceeds in three steps: first, variables are selected and defined, second, the joint probability distribution over these variables is defined, usually by decomposing it as a product of probability distributions, which are simplified thanks to conditional independence hypotheses, and third and last, each of the terms in the decomposition is associated to a parametric form and a manner to identify these parameters (whether by experimental learning or by a priori definitions). We now provide the definition of the model, following each of these steps.

### Variable definitions

For convenience, we recall here the variable definitions provided in the main text. Variables  $M$ ,  $A_M$ ,  $S_M$ ,  $A_\Phi$  and  $S_\Phi$  are one dimensional continuous variables, i.e., each is in  $\mathbb{R}$ . Variable  $\Phi$  is a three-valued categorical variable, with  $\Phi = \{/i/, /e/, /a/\}$ . Finally, variables  $C_S$  and  $C_A$  are binary variables, i.e. two-valued categorical variables, with  $C_S = C_A = \{0, 1\}$ .

### Decomposition of the joint probability distribution

With these variables, the joint probability distribution that defines our model mathematically is  $P(M S_M A_M \Phi S_\Phi A_\Phi C_S C_A)$ . Choosing a variable ordering and applying the chain rule, it is equal to:

$$\begin{aligned}
 & P(M S_M A_M \Phi S_\Phi A_\Phi C_S C_A) \\
 &= P(M)P(A_M | M)P(S_M | A_M M) \\
 &\quad P(\Phi | S_M A_M M)P(A_\Phi | \Phi S_M A_M M)P(S_\Phi | A_\Phi \Phi S_M A_M M) \\
 &\quad P(C_A | S_\Phi A_\Phi \Phi S_M A_M M)P(C_S | C_A S_\Phi A_\Phi \Phi S_M A_M M) .
 \end{aligned} \tag{1}$$

We now apply conditional independence hypotheses to simplify some of these terms.

The first two,  $P(M)$  and  $P(A_M | M)$ , are left unchanged. The term  $P(S_M | A_M M)$  is simplified into  $P(S_M | M)$ : this assumes that the cognitive agent's knowledge about the somatosensory consequence of some motor command  $m$  is independent of the acoustic consequence of  $m$  when  $m$  is known. In other words, the main cause of somatosensory signals  $S_M$  is assumed to be motor commands, and the cognitive agent dismisses the additional information carried out by  $A_M$  about  $S_M$ . What is lost in this approximation is the possible physical effect of acoustic waves provoked by sound production on somatosensory sensors; an effect likely to be negligible. It has to be noted that this conditional independence hypothesis between  $S_M$  and  $A_M$  given  $M$  does not entail at all independence between  $S_M$  and  $A_M$ . For instance, in the model, the cognitive agent can retrieve  $P(S_M A_M) \propto \sum_M P(M)P(A_M | M)P(S_M | M)$  which is not equal to  $P(S_M)P(A_M)$  in the general case. This means that the model contains knowledge about relations between auditory and somatosensory consequences of motor commands, but it does not store it as an explicit piece of knowledge.

The three next terms are assumed to constitute a separate piece of model, independent from knowledge about motor commands and their sensory consequences, so that variables  $S_M$ ,  $A_M$  and  $M$  can be dropped. This yields  $P(\Phi)$ ,  $P(A_\Phi | \Phi)$  and  $P(S_\Phi | A_\Phi \Phi)$ . Furthermore, using a similar conditional independence hypothesis as above, we assume that phonemes are characterized independently into

acoustic and somatosensory spaces. In other words, the somatosensory characterization  $S_\Phi$  of some phoneme  $\phi$  is supposed to be independent of the acoustic characterization  $A_\Phi$  of this phoneme, when  $\phi$  is known. Therefore,  $P(S_\Phi | A_\Phi \Phi)$  is simplified into  $P(S_\Phi | \Phi)$ .

Finally, the last two terms concerns coherence variables, which we, as modelers, connect explicitly to chosen variables: first, variable  $C_A$  serves as a connector between auditory representations  $A_M$  and  $A_\Phi$ , second, variable  $C_S$  serves as a connector between somatosensory representations  $S_M$  and  $S_\Phi$ . This yields terms  $P(C_A | A_M A_\Phi)$  and  $P(C_S | S_M S_\Phi)$ .

Replacing each term of Eq (1) by its simplified form, we obtain the decomposition of the joint distribution shown in the main text (Eq. (1)), which we repeat here:

$$\begin{aligned} P(M S_M A_M \Phi S_\Phi A_\Phi C_S C_A) \\ = P(M)P(A_M | M)P(S_M | M) \\ P(\Phi)P(A_\Phi | \Phi)P(S_\Phi | \Phi) \\ P(C_A | A_M A_\Phi)P(C_S | S_M S_\Phi) . \end{aligned} \quad (2)$$

## Parametric forms

Parametric forms for all terms in Eq (2) are provided in the main text. We still describe here, in a bit more detail, the properties of coherence variables (demonstrations are available elsewhere [2, 1]. Recall that coherence variables are binary variables associated with Dirac distributions that enforce matching constraints. Consider  $C_A$ : we have defined

$$P([C_A = 1] | [A_M = a_m] [A_\Phi = a_\phi]) := \begin{cases} 1 & \text{if } a_m = a_\phi; \\ 0 & \text{otherwise.} \end{cases} \quad (3)$$

Given this definition, coherence variables can be used, during inference, as “switches”, allowing the modeler to control the propagation of information throughout the model. There are three cases to consider.

First, when left unspecified in the computed question, the switch is open, and portions of the model on each side of the coherence variable do not exchange information. For instance, in the model, the portion of the model about phoneme characterizations can be “separated” from the portion about the sensory consequences of motor commands:  $P(M | A_M S_M)$  can be completely computed by involving terms  $P(M)$ ,  $P(A_M | M)$  and  $P(S_M | M)$ , as other terms of the decomposition are “beyond” the coherence variables, which are not specified in  $P(M | A_M S_M)$ . Computing the motor cause of some sensed sensory event  $A_M, S_M$  would only involve knowledge about the way motor commands provoke sensory effects; whatever the phonological plausibility of this sensory event.

Second, when set to 1 in the computed question, the switch is closed, and variables on each side of the coherence variable are forced to have equal values, so that information about one variable propagates and constrains the other. For instance, in the model, computing  $P(M | A_M S_M [C_A = 1] [C_S = 1])$  would be influenced by phonological knowledge, as the “switches” are here closed so that  $A_M$  is constrained by  $A_\Phi$  and  $S_M$  is constrained by  $S_\Phi$ . Here, computing the motor cause of some sensed sensory event,  $A_M$  and  $S_M$ , would also involve the phonological plausibility of this sensory event.

Third and finally, when set to 0, variables are forced to be different, which is less useful in practice – but see [1, p 139].

## References

1. Bessière P, Mazer E, Ahuactzin JM, Mekhnacha K. Bayesian Programming. Boca Raton, Florida: CRC Press; 2013.
2. Gilet E, Diard J, Bessière P. Bayesian Action–Perception Computational Model: Interaction of Production and Recognition of Cursive Letters. PLOS ONE. 2011;6(6):e20387.
